# Supplementary material for: Dynamic Imaging of the Effector Immune Response to Listeria Infection In Vivo
Source: PLoS Pathog. 2011 Mar 24;7(3):e1001326. doi: 10.1371/journal.ppat.1001326 (PMC3063765; doi:10.1371/journal.ppat.1001326)
Supplement: Text S1 — Supplemental Figures. Supplemental figures cited in the main text. (9.17 MB DOC) [file ppat.1001326.s001.doc]

**Supplemental Data**

**Dynamic Imaging of the Effector Immune Response to *Listeria* Infection *in vivo***

**Janelle C. Waite, Ingrid Leiner, Peter Lauer, Chris S. Rae, Gaetan Barbet, Huan Zheng, Daniel A. Portnoy, Eric G. Pamer, and Michael L. Dustin**

**Supplemental Figures**

**
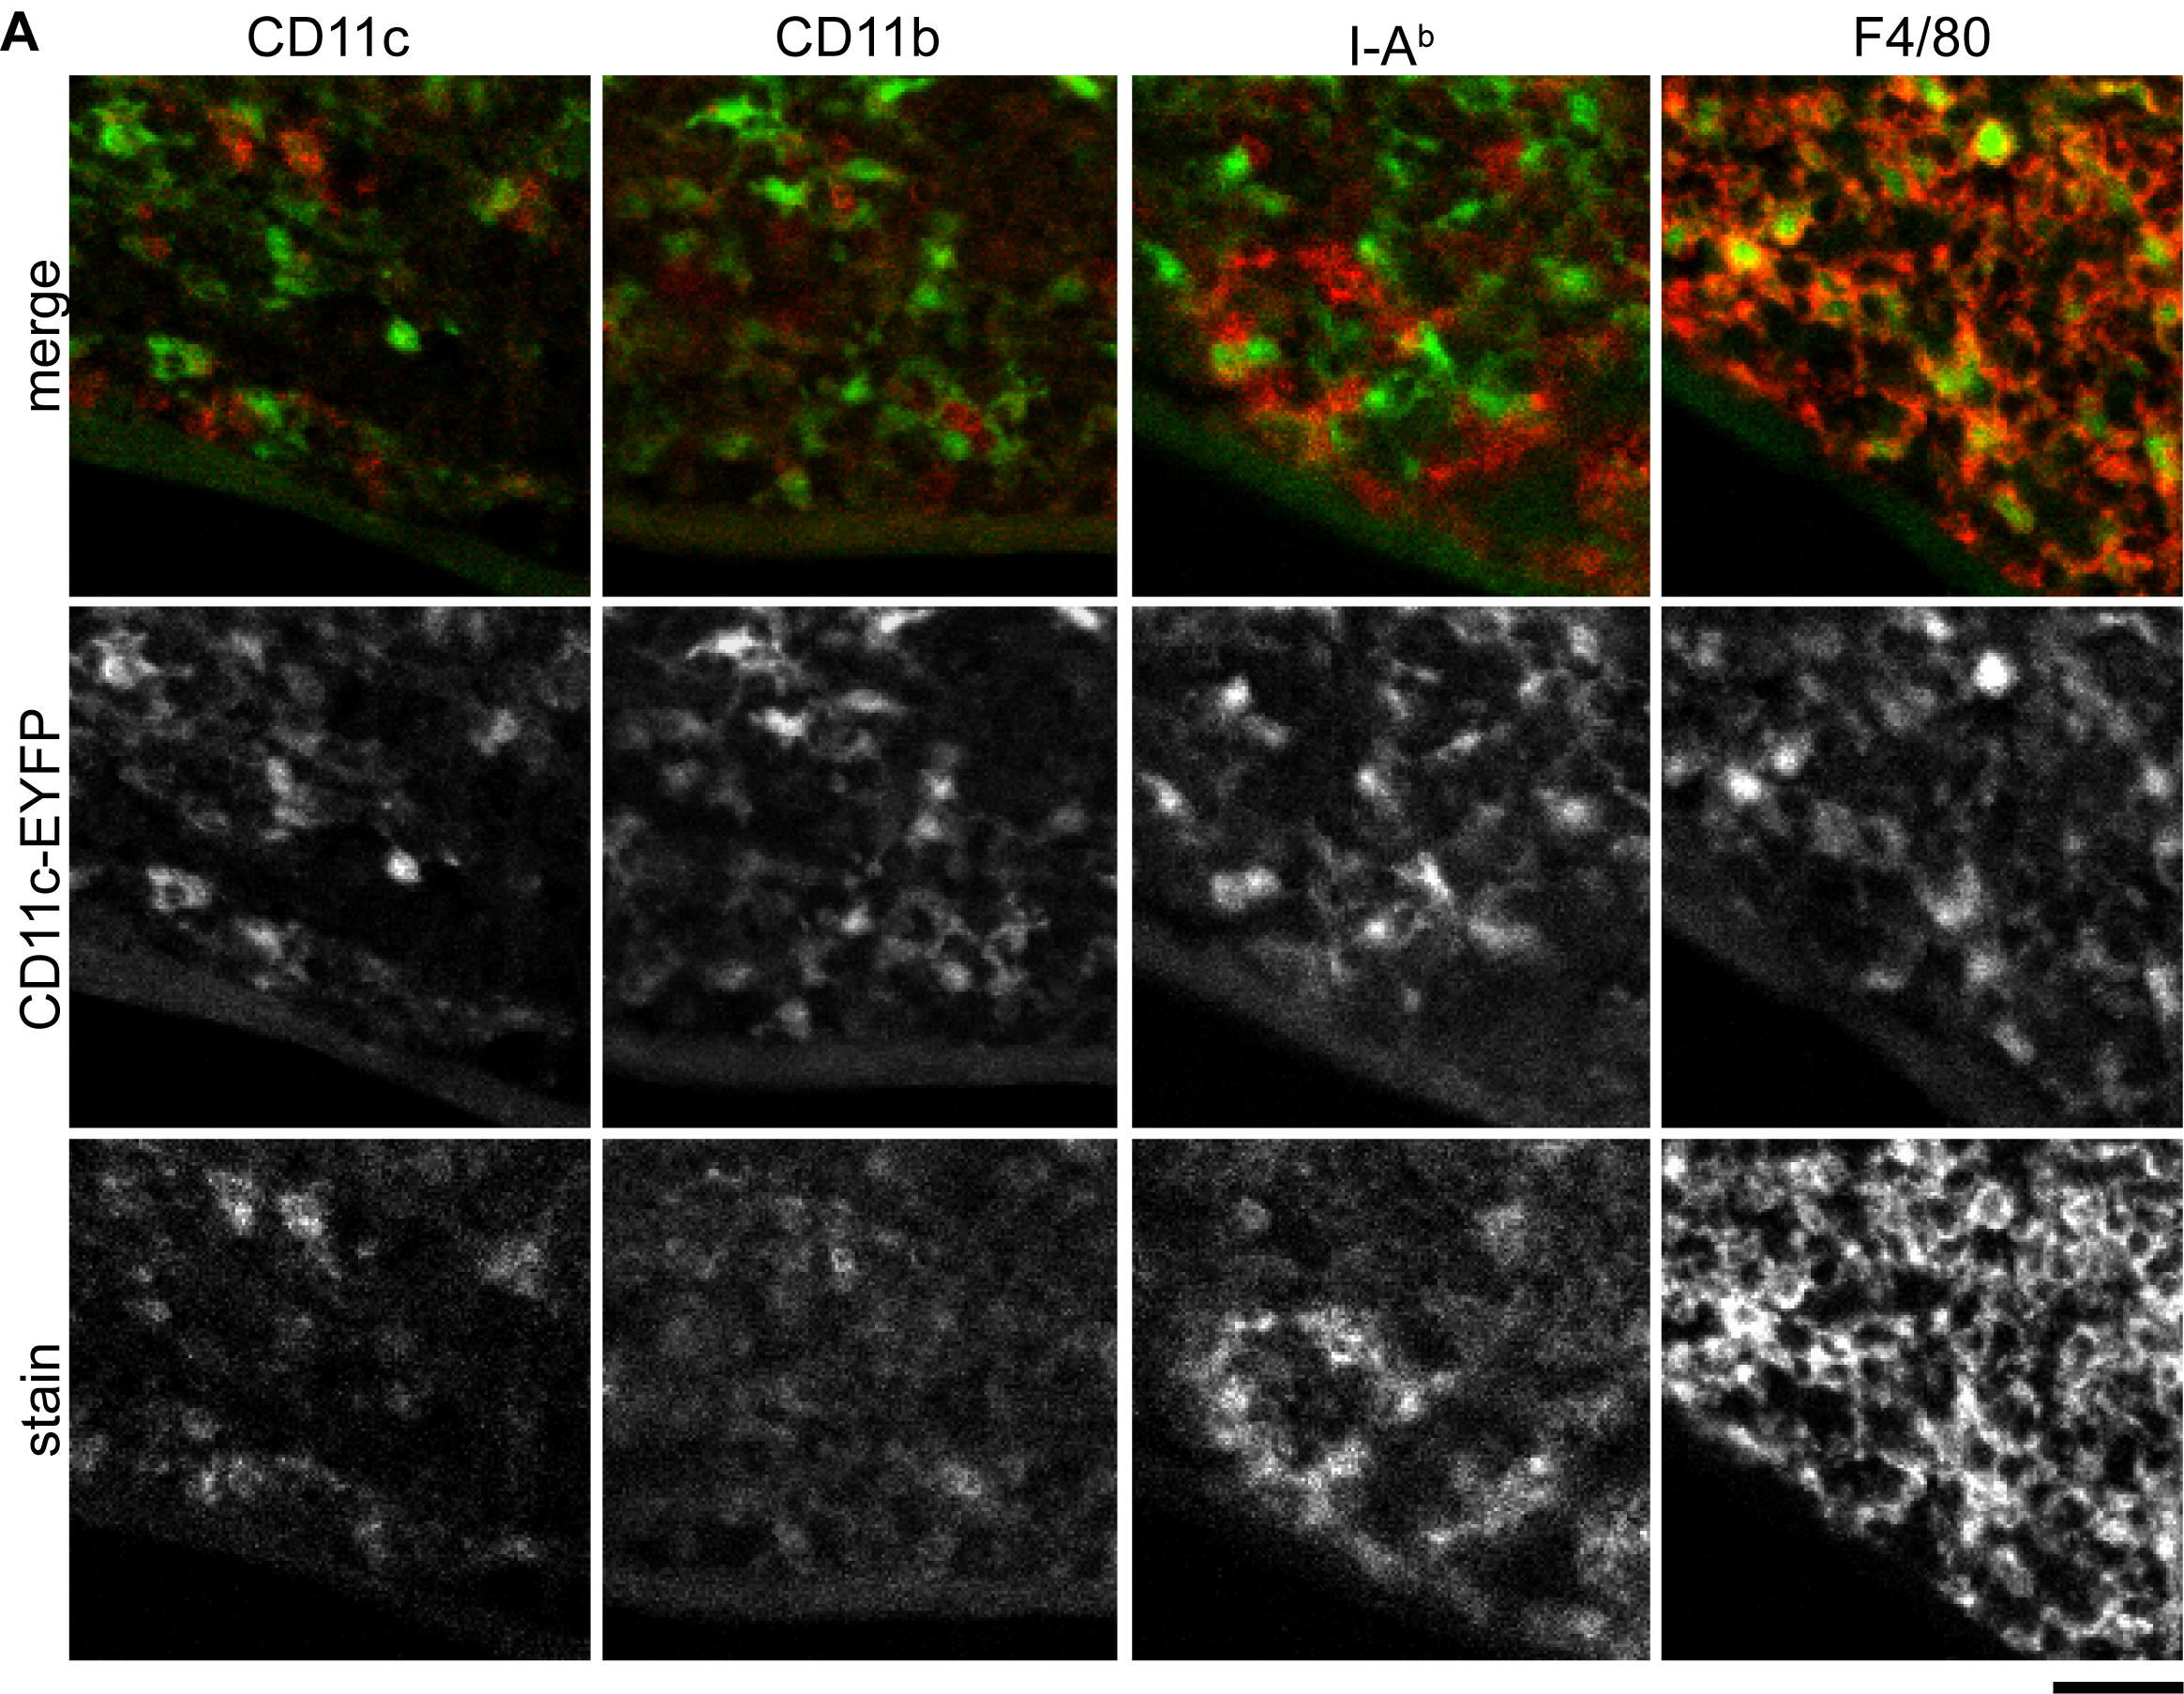
**

**
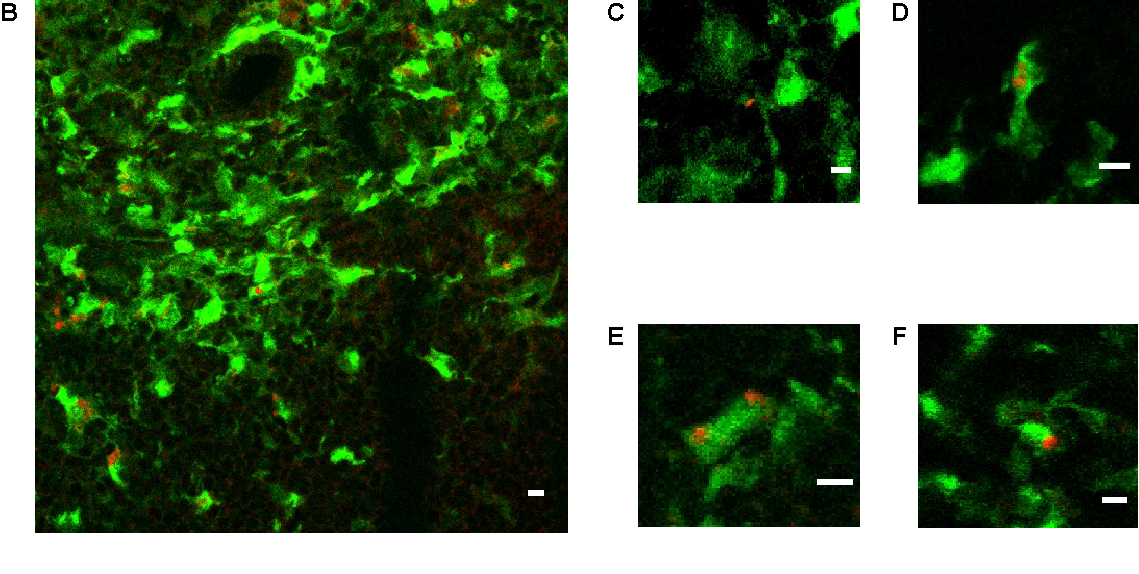
Figure S1. Surface molecule staining of CD11c-EYFP+ cells in the scRP and localization of acutely injected *Lm*.** A. Frozen sections of spleen from uninfected CD11c-EYFP mice were stained for the indicated surface molecules. Pseudo-colored merge images are shown with CD11c-EYFP (green) and the indicated stain (red). Pictures were taken near the outer capsule in the same region imaged in intravital microscopy experiments. Scale bar = 25m. B-F. 107 Bodipy-630 labeled *Lm* (red) were injected in the retro-orbital plexus of CD11c-EYFP (green) mice and spleens were perfusion fixed 5 minutes later. Frozen 10m sections were cut and mounted onto slides for imaging. B. Whole image showing several *Lm* associated with CD11c-EYFP+ cells. C. Cropped image showing single *Lm* associated with a CD11c-EYFP+ cell dendrite. D. Cropped image showing a single *Lm* inside a CD11c-EYFP+ cell. E. Cropped image showing two *Lm* associated with CD11c-EYFP+ cell. F. Cropped image showing a single *Lm* inside a CD11c-EYFP+ cell. Scale bar = 5m. Data is from 2 mice. Data is related to Figure 1.

**
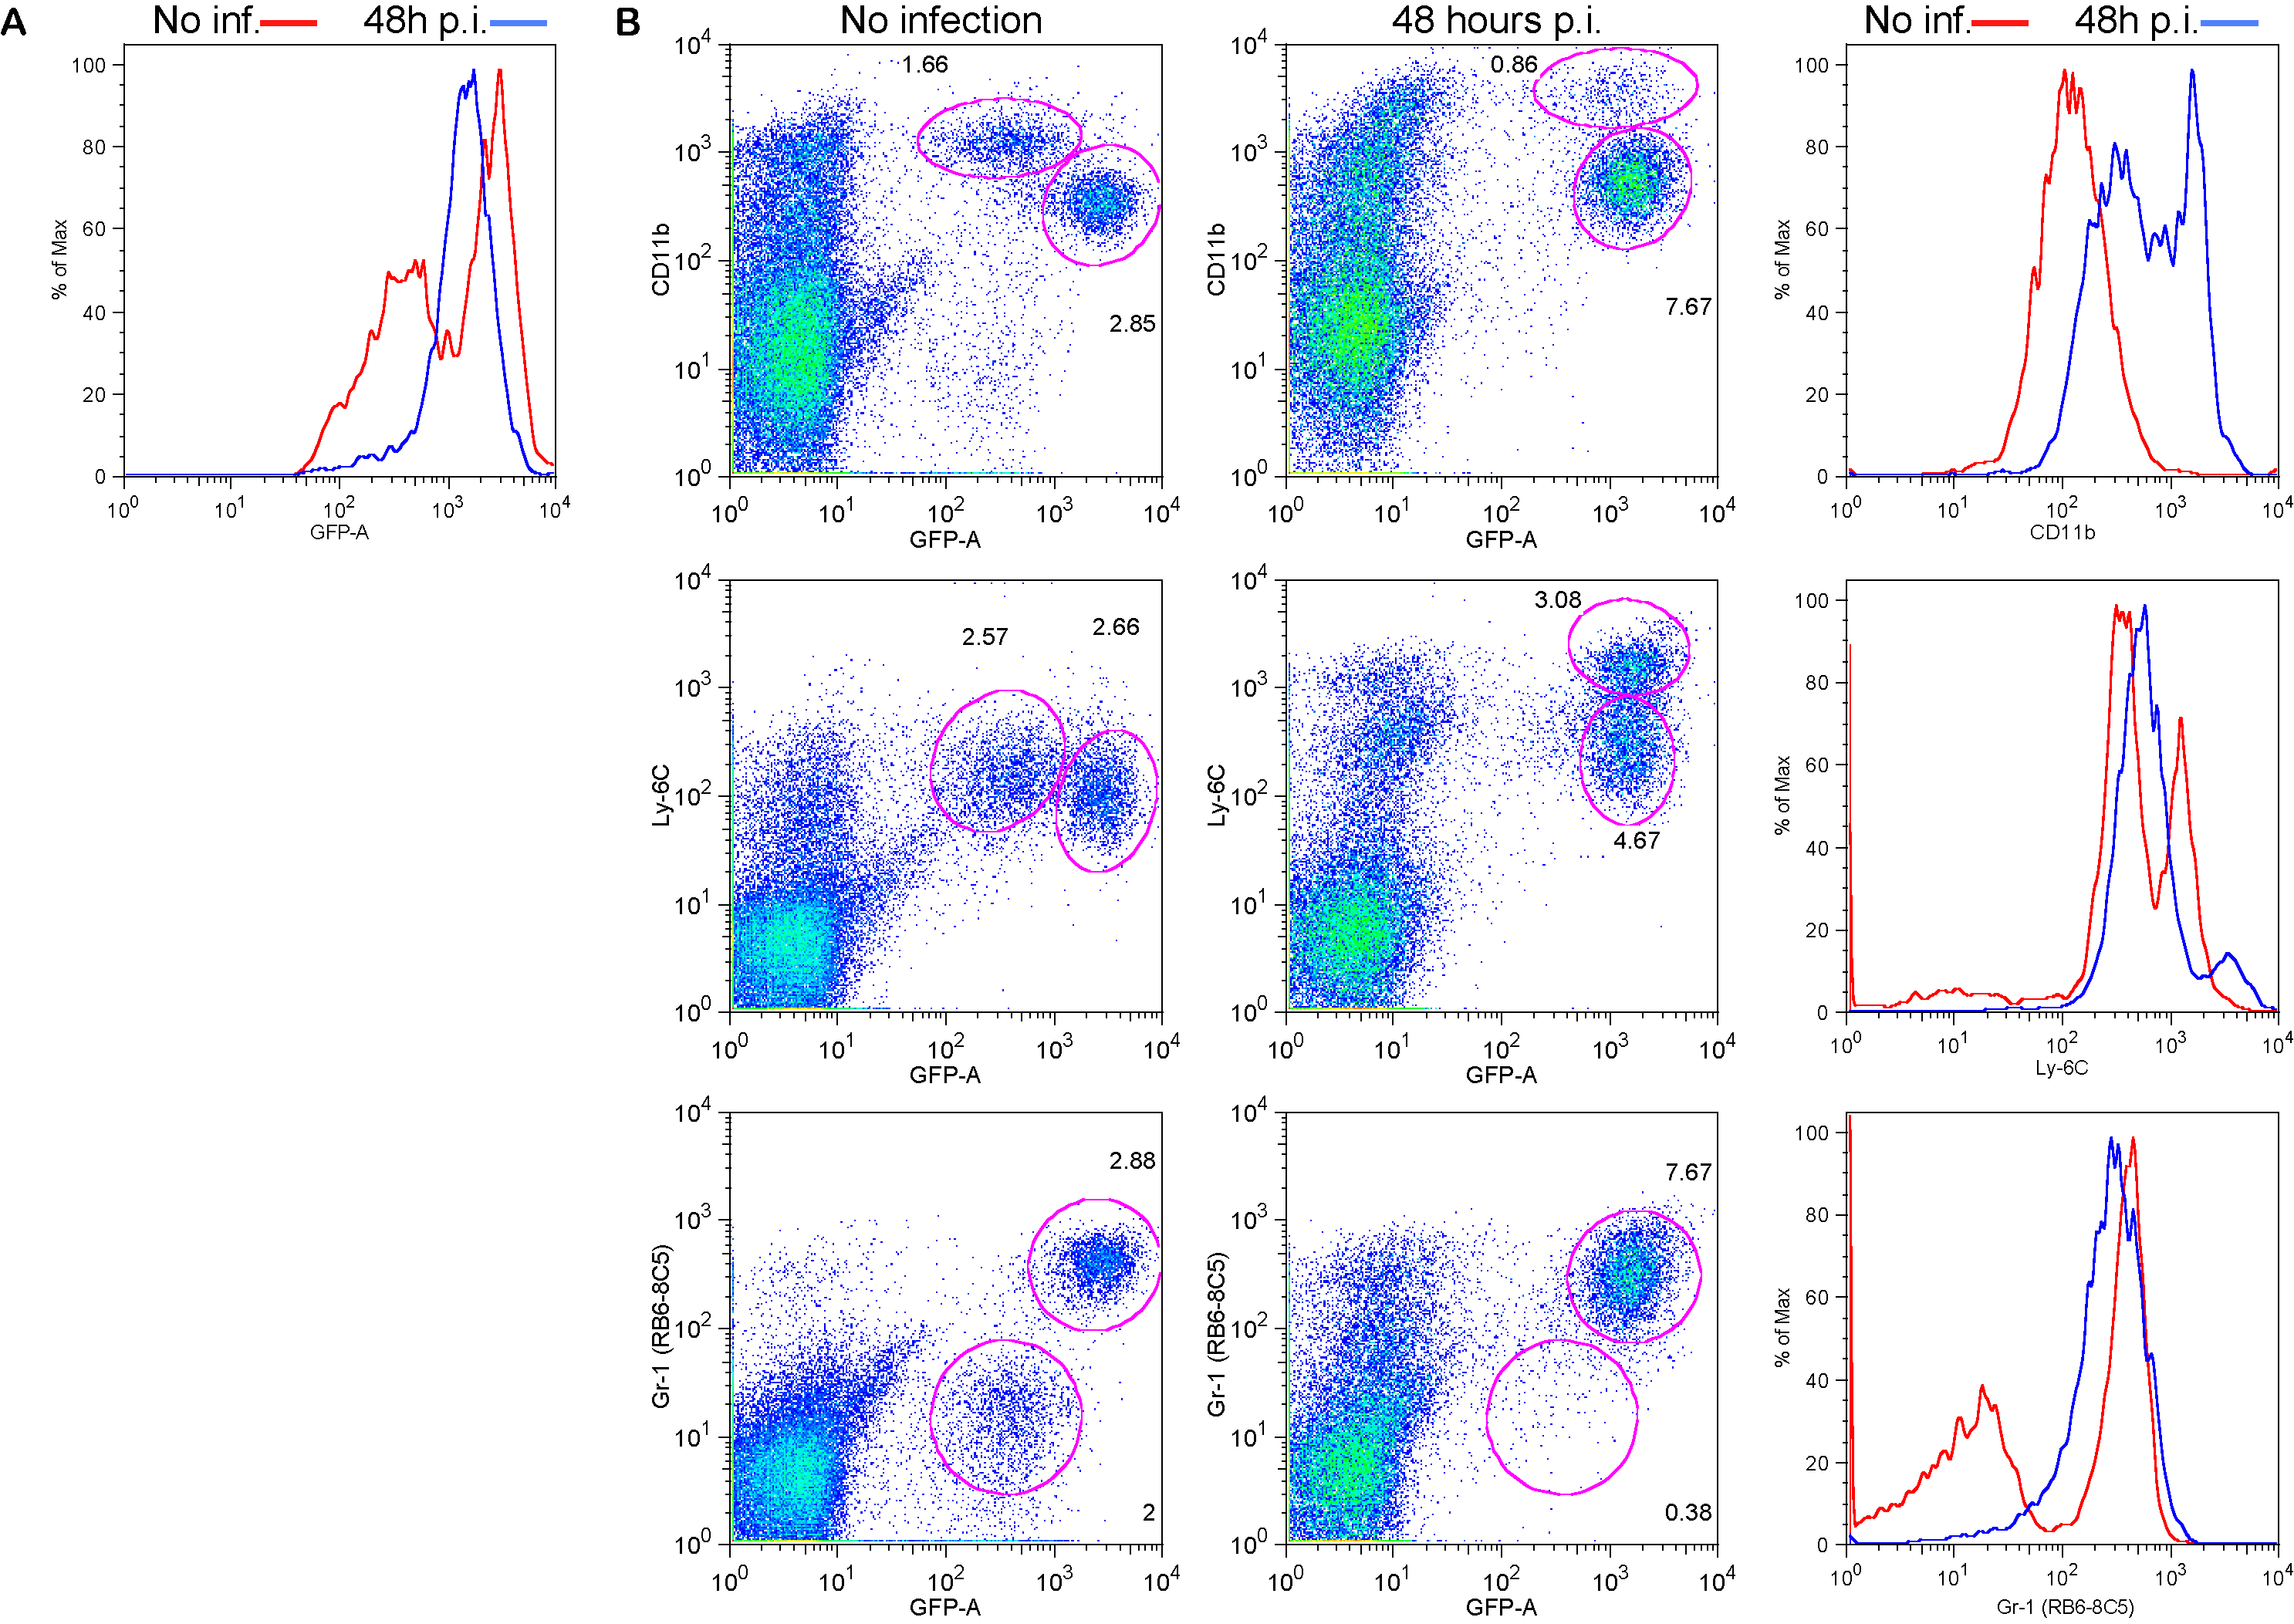
**

**Figure S2. LysM-EGFP expression labels myelomonocytes the spleen.** Splenocytes were isolated from LysM-EGFP mice either uninfected or 48 hours post infection (p.i.). A. GFP+ gate showing GFP expression intensity in uninfected (No inf., red) and 48 hours p.i (48h p.i., blue). B. Surface marker staining of the indicated molecules (Y-axis) and GFP expression (X-axis). GFP+ cells were gated and histograms of surface marker expression are shown in uninfected (No inf., red) and 48 hours p.i. (48h p.i., blue). Data is related to Figure 2.


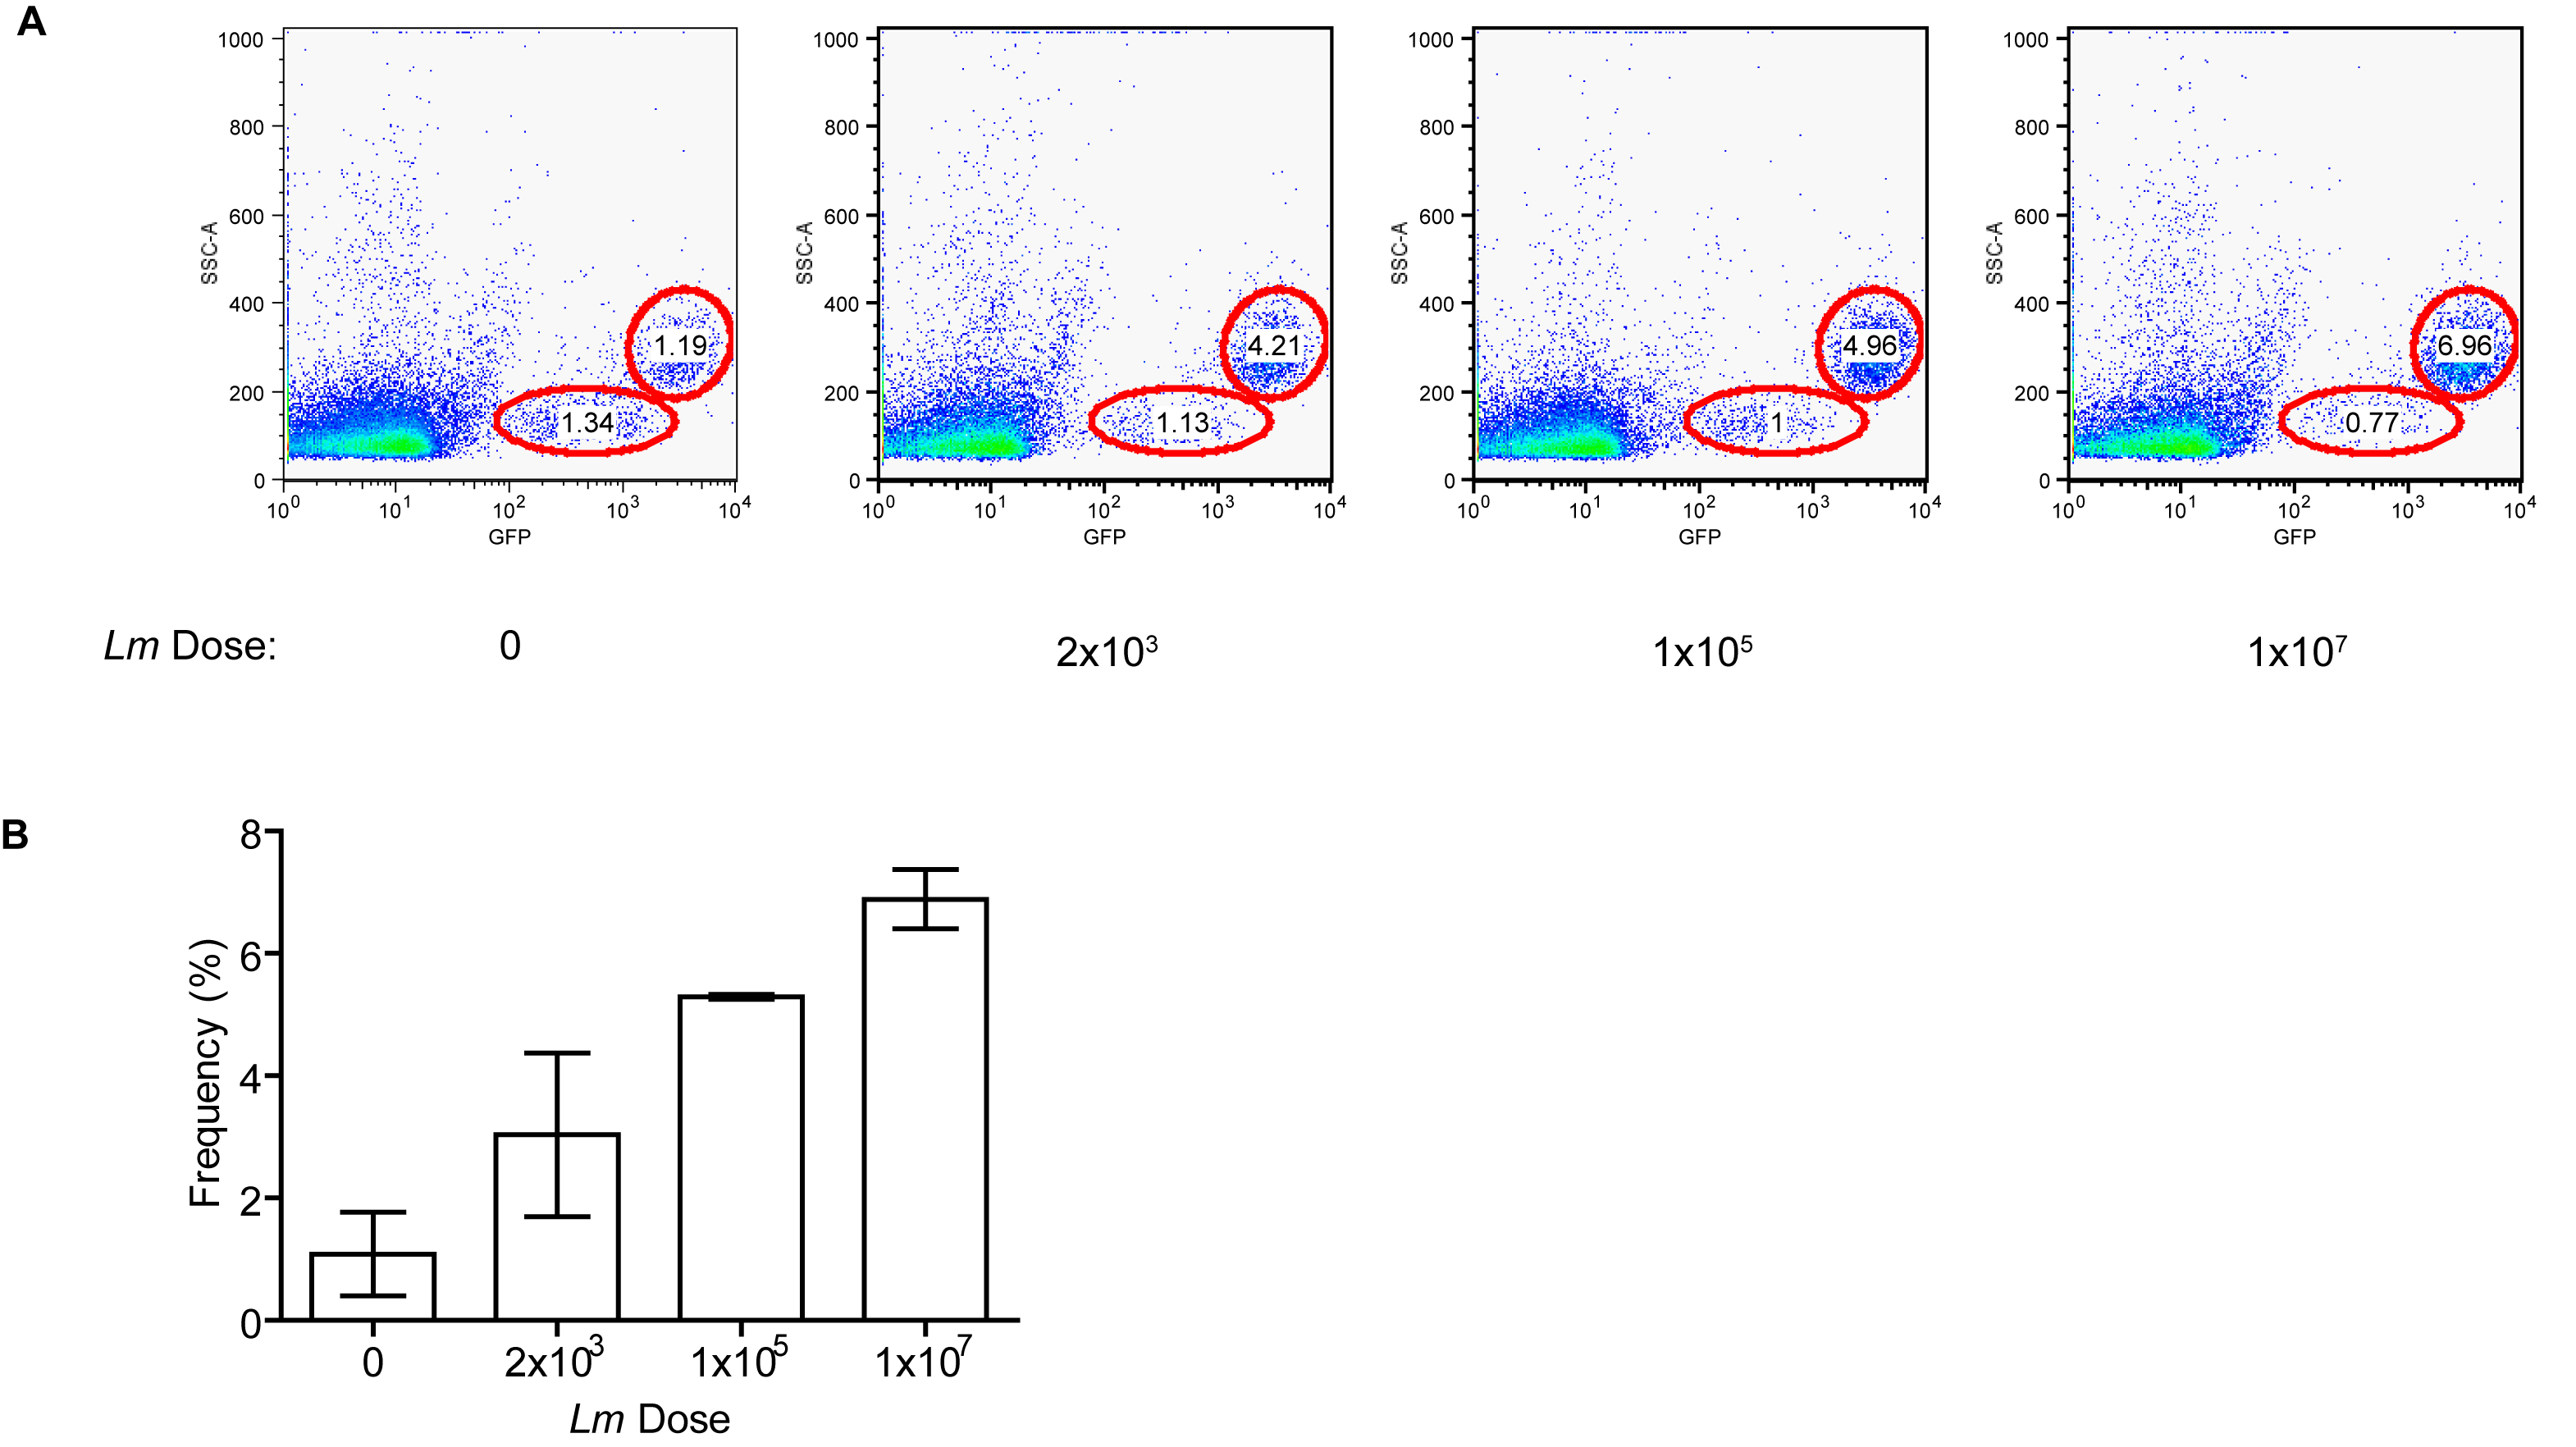


**Figure S3. Neutrophil accumulation in the spleen occurs within 1 hour of *Lm* injection in a dose dependent manner.** LysM-EGFP mice were infected with the indicated number of *Lm* and splenocytes were collected 1 hour later for analysis by FACS. A. GFP intermediate and high populations are gated. B. Quantification of GFP high populations. Data is from 3 mice, Error bars represent SEM. Data is related to Figure 2.

**
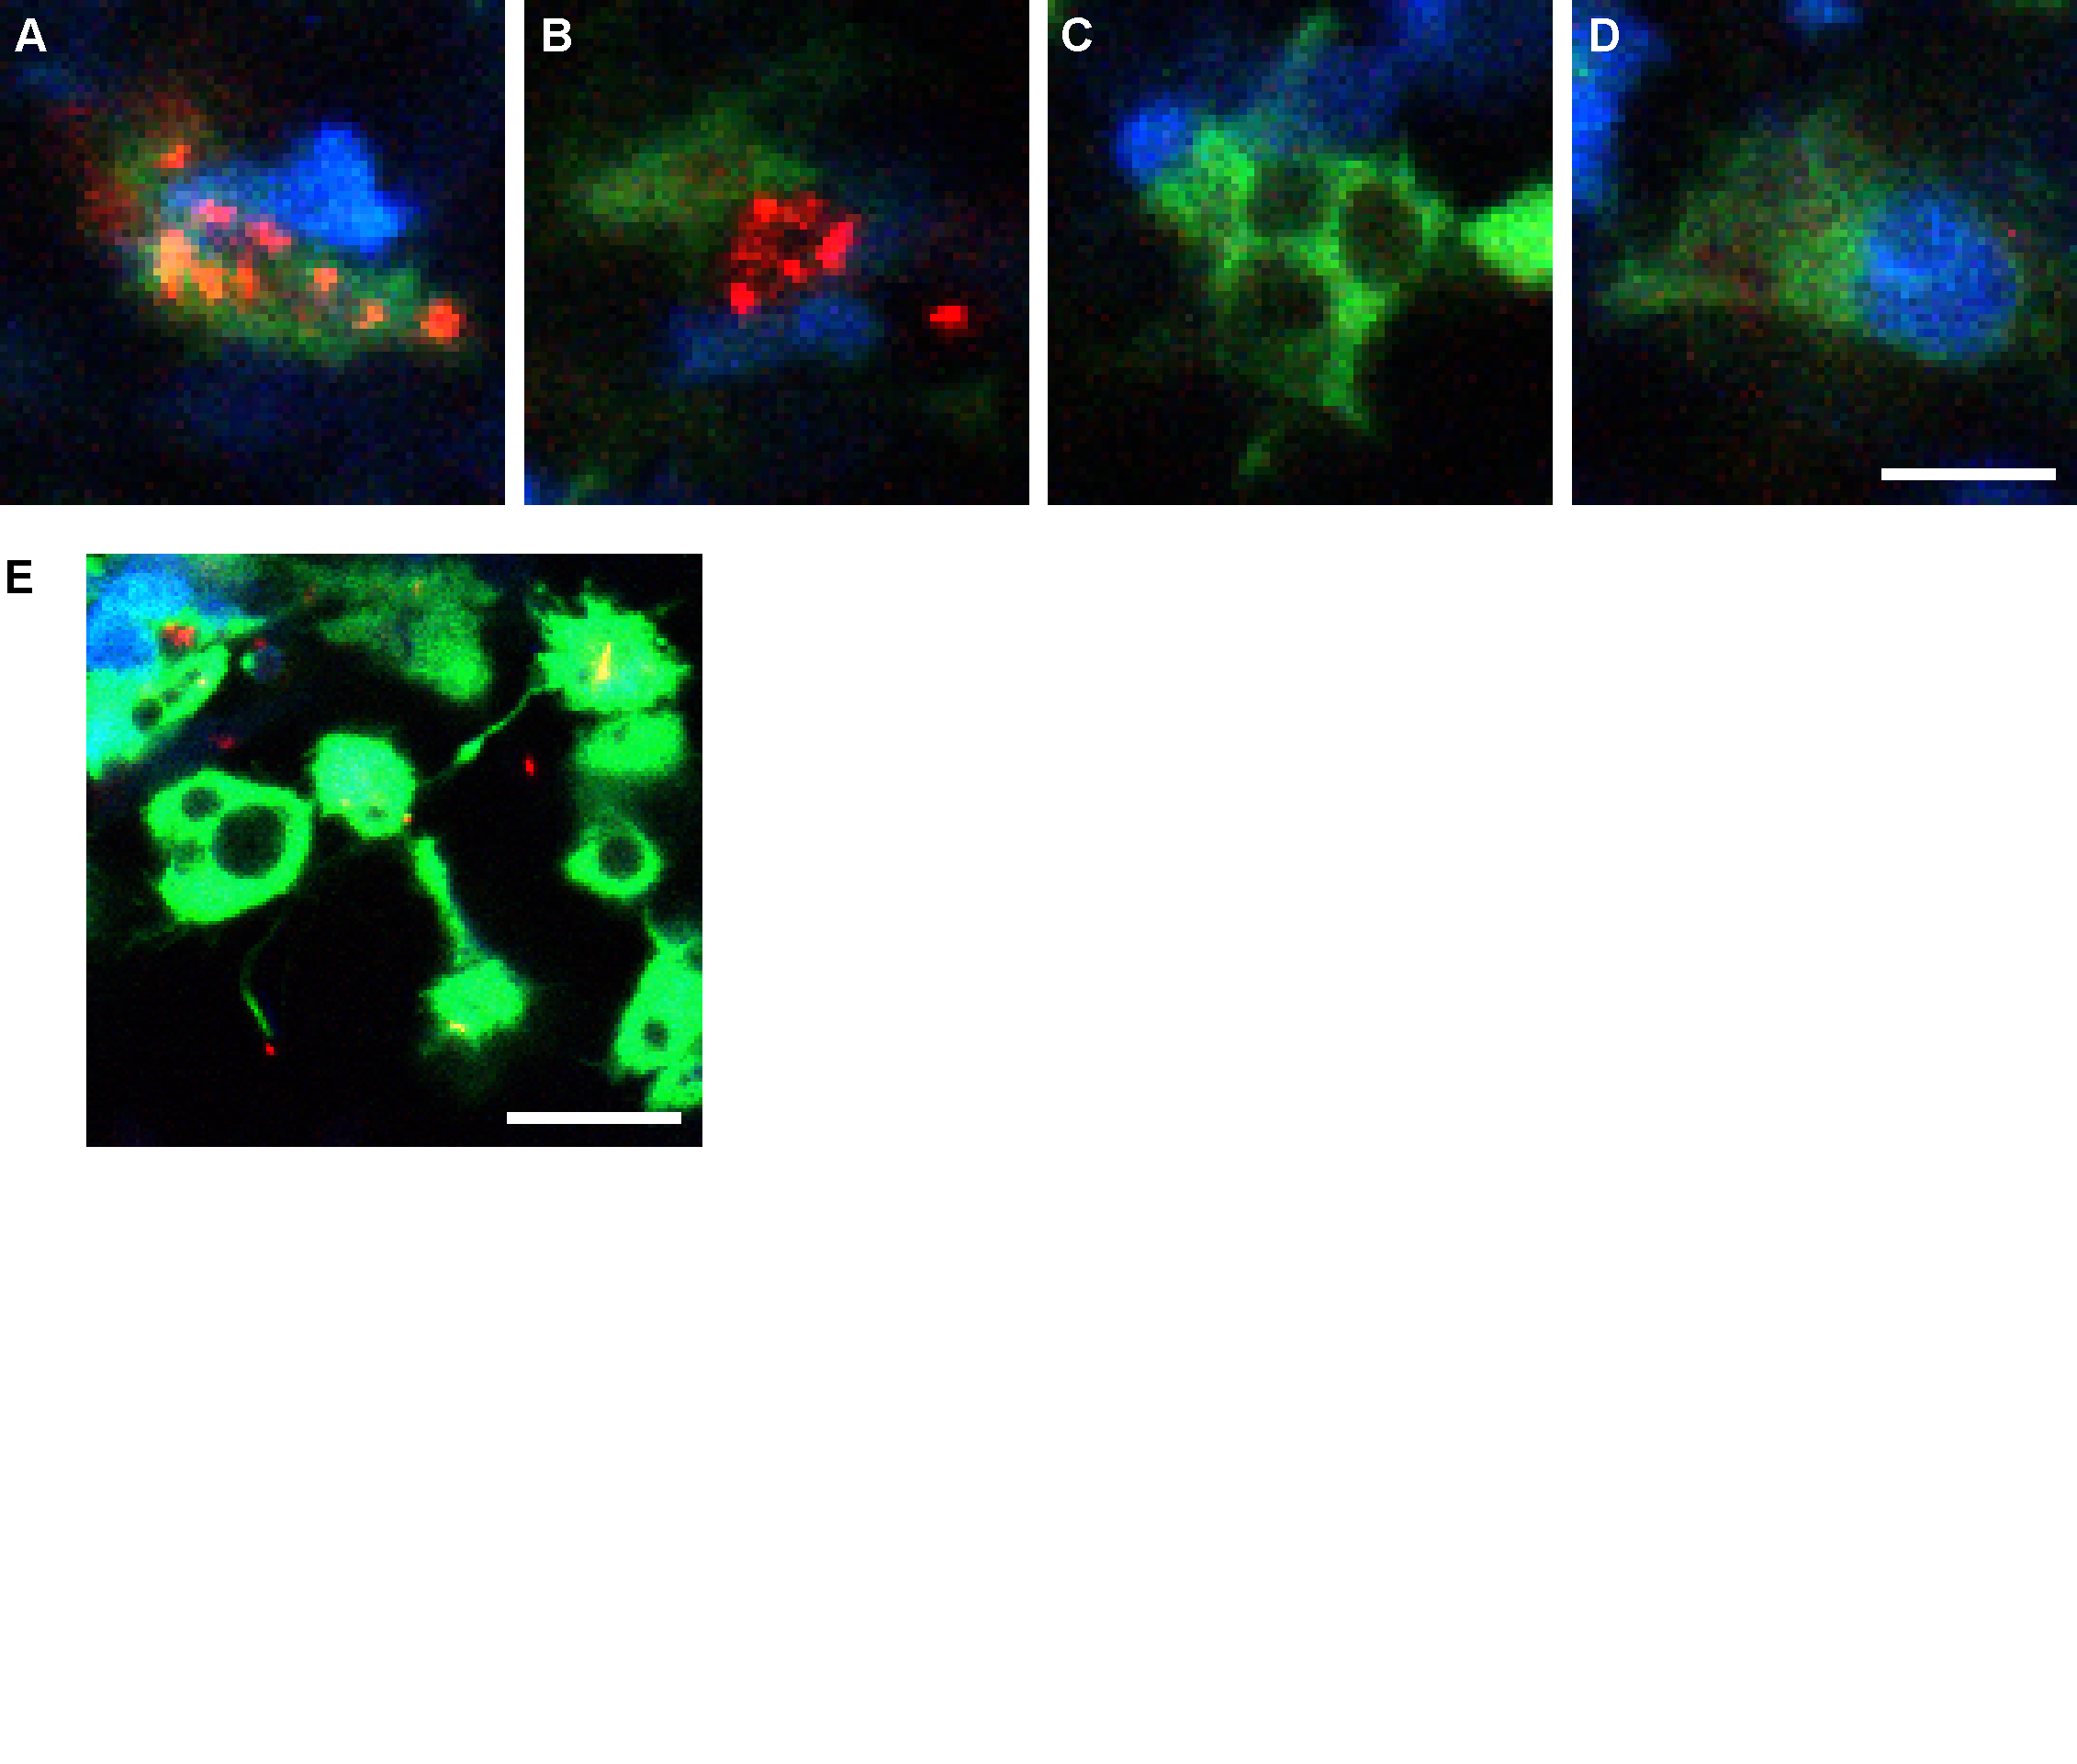
**

**Figure S4. *In vivo* visualization of *Lm-RFP,* MMC and DC at foci of infection.** CD11c-EYFP and LysM-EGFP double transgenic mice were infected with 2.5x105 *Lm-RFP* and their spleens were imaged 24 (A-D) and 48 (E) hours post infection. CD11c-EYFP (green), LysM-EGFP (blue) and *Lm-RFP* (red) signals are shown. A. CD11c-EYFP DC containing multiple *Lm-RFP*. B. Non-fluorescent cell containing multiple *Lm-RFP*. C. CD11c-EYFP cells fused together with large vacuoles. D. LysM-EGFP MMC taken up by CD11c-EFYP DC. E. Listeriopods protrude from infected CD11c-EYFP DC and nanotubes connect adjacent DC. This data is representative of 2-4 fields/mouse from at least 12 mice. Snapshots are from Movie S4. Data is related to Figure 3.

**
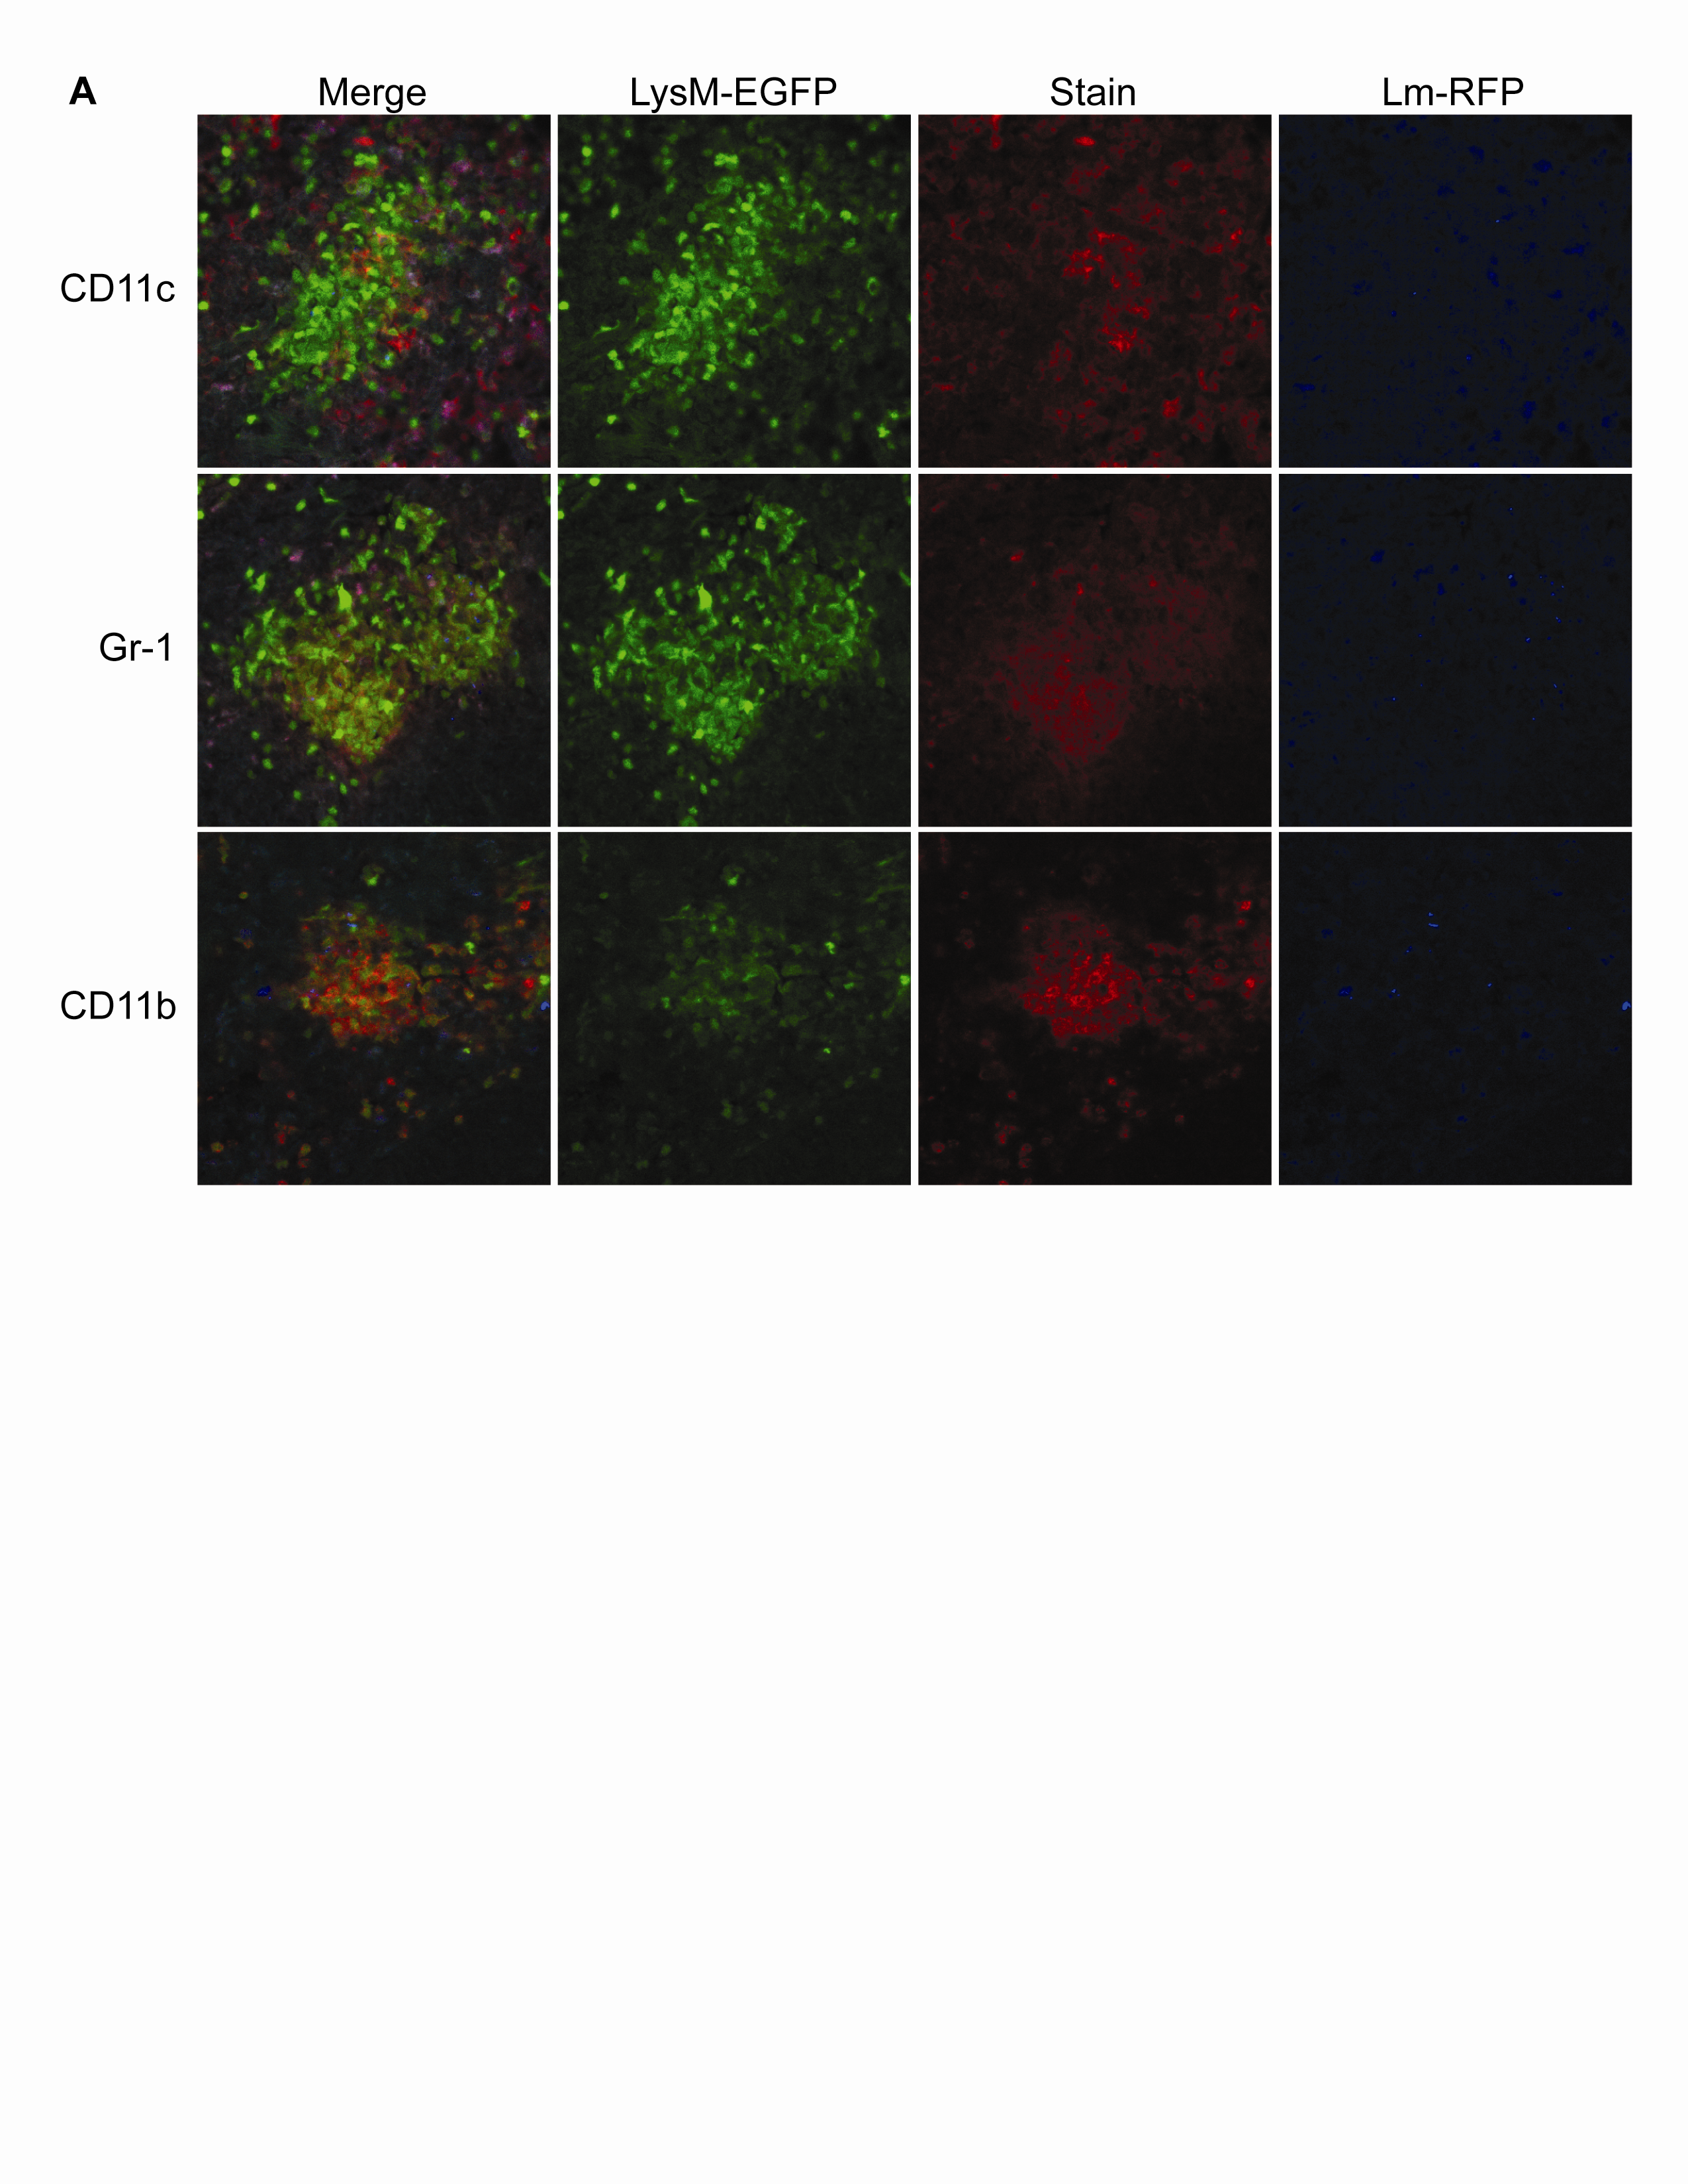
Figure S5. LysM-EGFP+ cells at *Lm-RFP* foci are positive for CD11b and Gr-1 but not CD11c.** Frozen sections from spleens of LysM-EGFP mice 48 hours p.i. with *Lm-RFP* stained with indicated fluorescently conjugated antibodies. Panels show merge, LysM-EGFP (green), indicated stain (red) and *Lm-RFP* (blue). Data is related to Figure 4.

RB6-8C5 (g)

**
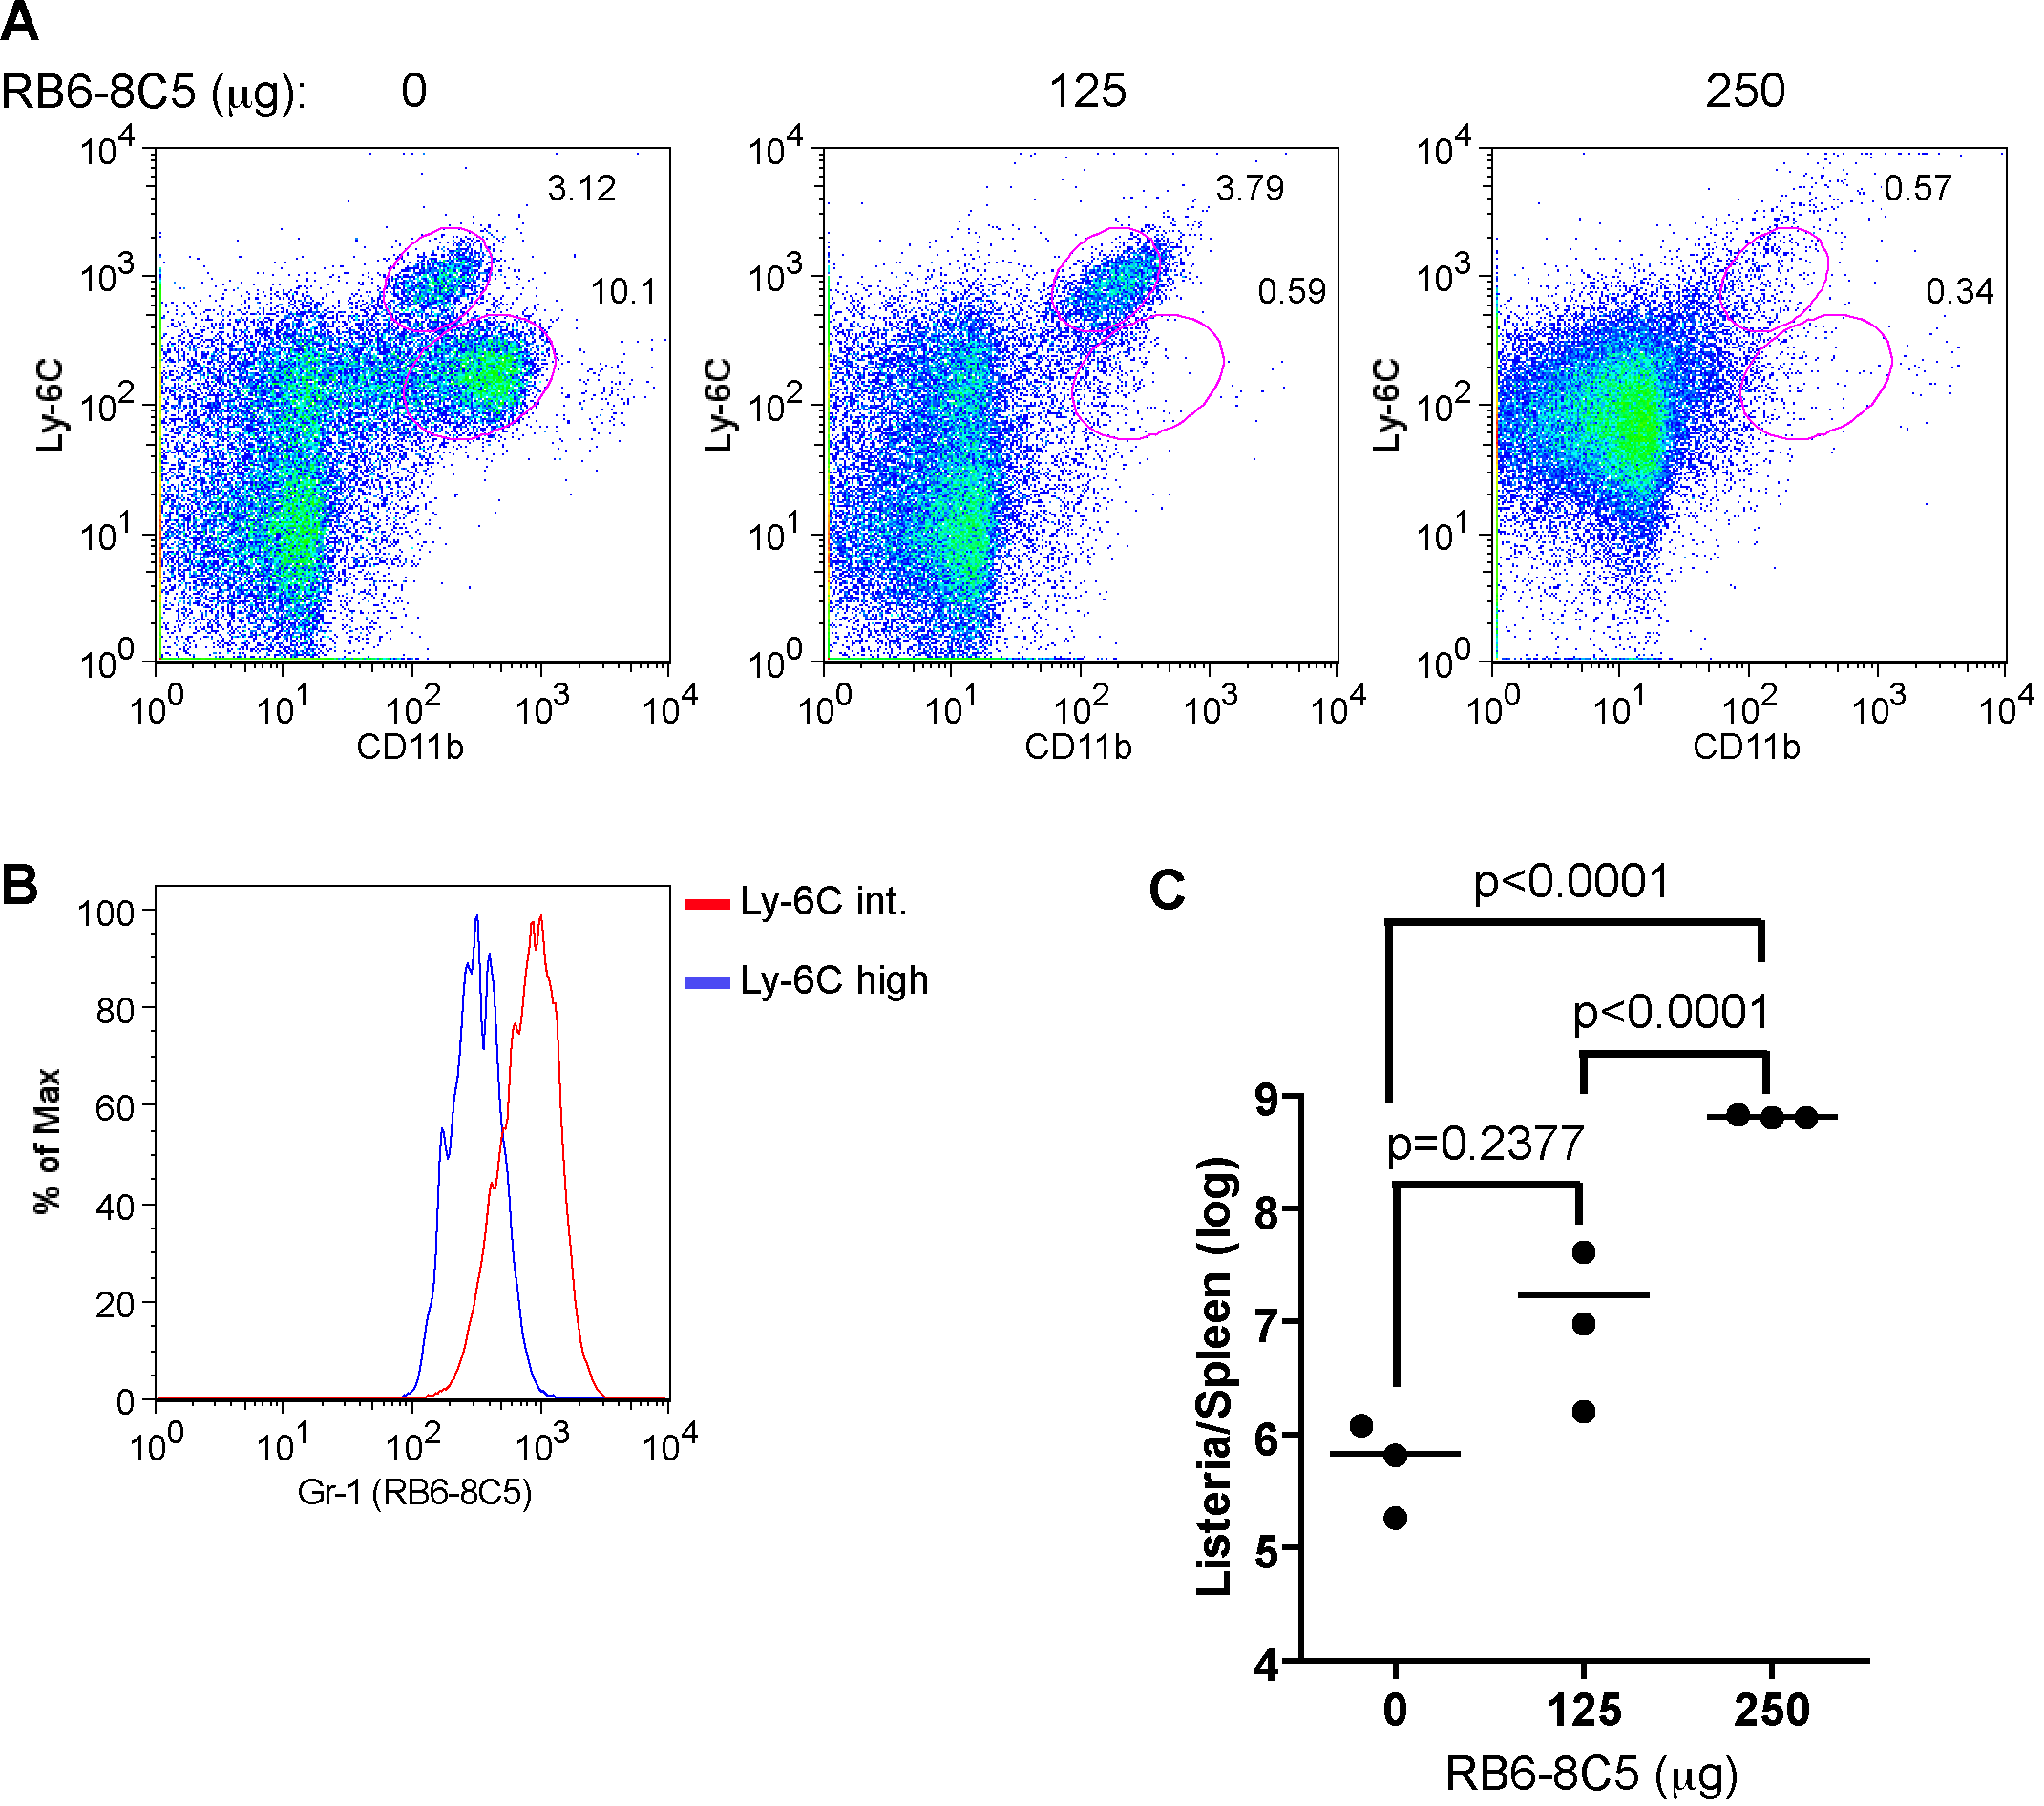
**

**Figure S6. Graded depletion of Gr-1 expressing MMC causes increased *Lm* burden in the spleen 48 hours p.i.** LysM-EGFPmice were treated with RB6-8C5 at the indicated dose by intra-peritoneal (i.p.) injection 5 hours prior to infection with *Lm-RFP*. 48 hours after infection (48h p.i.) splenocytes were isolated for FACS analysis (A-B) or lysed to determine *Lm* burden by colony counts (C). A. FACS analysis of surface marker expression of CD11b (X-axis) and Ly-6C (Y-axis) and gating on Ly-6C high inflammatory monocytes and Ly-6C intermediate neutrophil populations. B. Ly-6C high (blue) and intermediate (int., red) gated populations are plotted for expression of Gr-1 (RB6-8C5). C. Splenocytes were lysed with 0.05% Triton-X 100 and bacteria were plated in serial dilutions on BHI agarose plates to obtain colony counts. from spleens of mice treated with the indicated dose of RB6-8C5. Data is from 3 mice per group. Data is related to Figure 5.


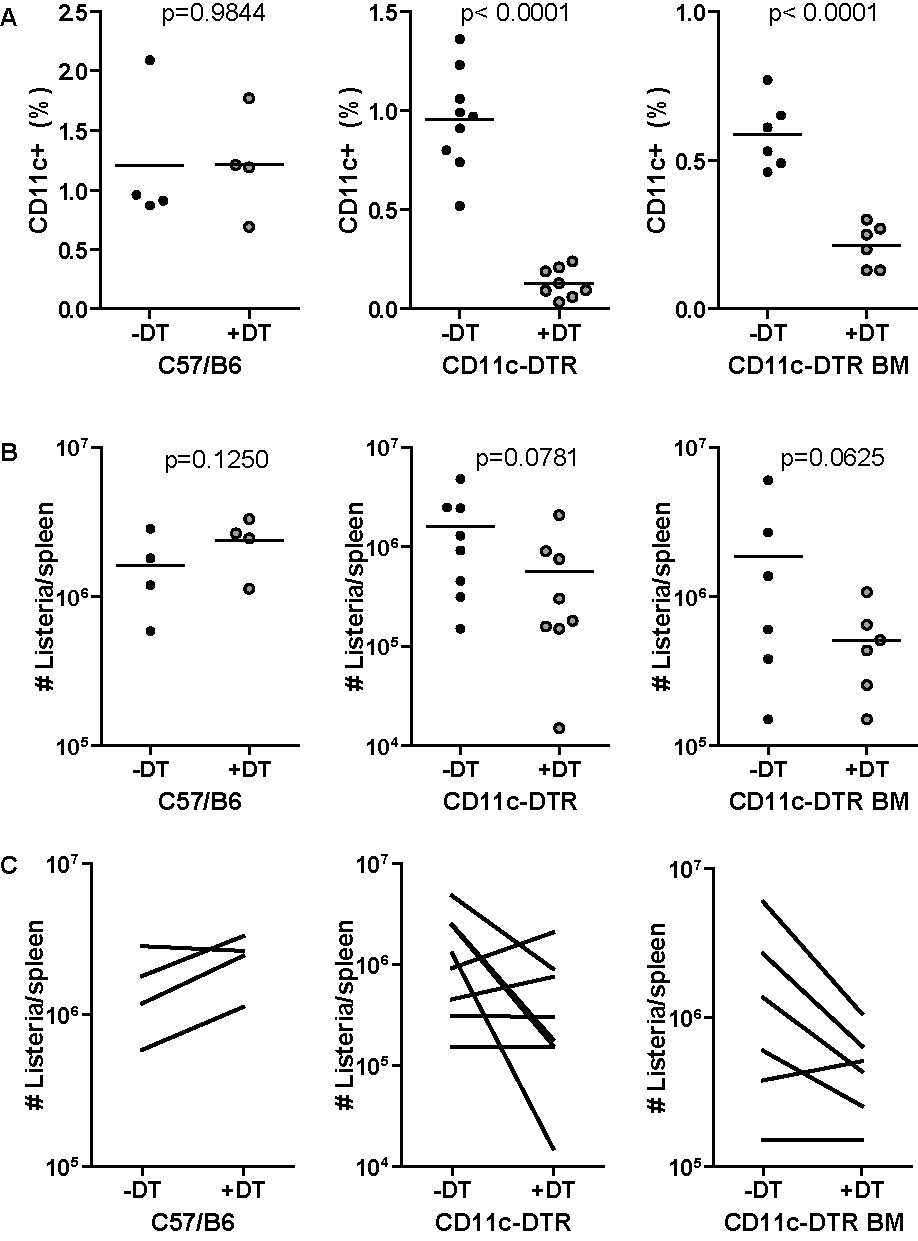


**Figure S7. DC are not required to restrict *Lm* growth in the spleen.** C57/B6, CD11c-DTR or CD11c-DTR bone marrow chimera (CD11c-DTR BM) mice were infected with *Lm-RFP* and 48 hours later treated with 1g DT by i.p. injection. Analysis was performed 24 hours after DT treatment (72 hours p.i.). A. Splenocytes were isolated for analysis of CD11c expression by FACS. B. Splenocytes were lysed with 0.05% Triton-X 100 and bacteria plated in serial dilutions on BHI agarose plates to obtain colony counts. P values were obtained by Wilcoxon signed rank test. Each dot represents data from one mouse, C57/B6, n=4; CD11c-DTR, n=9; CD-11c-DTR. Data is related to Figure 3-5.


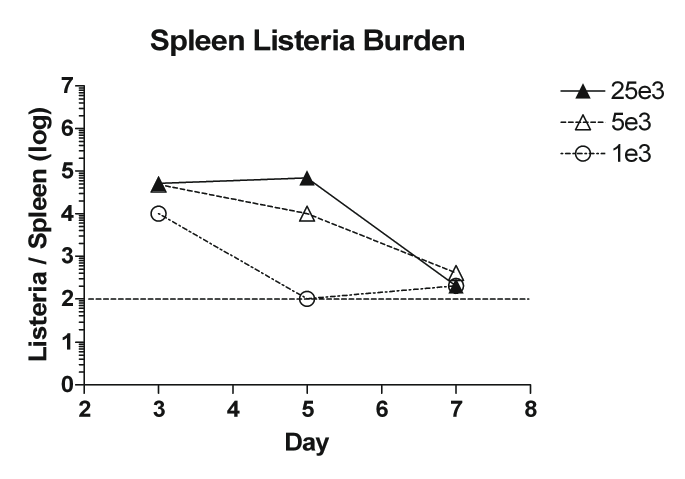


**Figure S8. *Lm-RFP* grow in the spleen up to day 3 and 5 and are cleared on day 7 post infection**. CB6/F1 mice were infected with the indicated dose of *Lm-RFP* and sacrificed at the indicated day post infection. Splenocytes were lysed with 0.05% Triton-X 100 and bacteria were plated in serial dilutions on Brain Heart Infused agarose plates to obtain colony counts. Data is related to Figure 6.


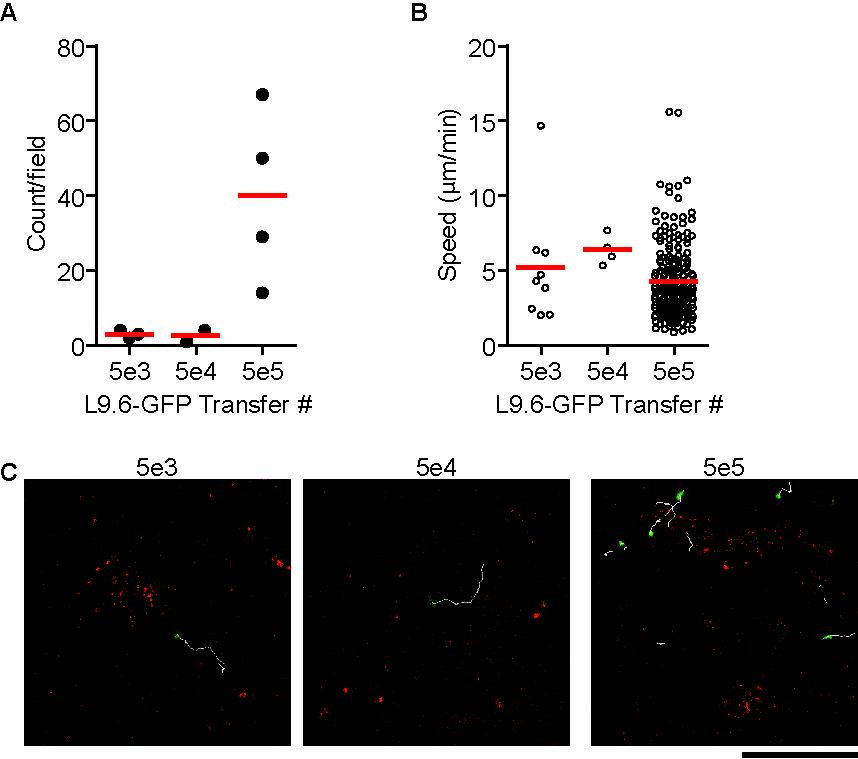


**Figure S9. Titration of the number of L9.6-EGFP T cells transferred in order to detect T cells at *Lm* foci on day 5 p.i.** L9.6-EGFP T cells were transferred at the indicated number to recipient mice one day prior to infection with *Lm-RFP*. A. Count of T cells detected at *Lm* foci on day 5 p.i. Each dot represents the number from individual mice. B. Speeds of T cells at *Lm* foci. C. Snapshots from intravital time-series showing L9.6-EGFP T cells (green), *Lm-RFP* (red) and T cell tracks (white). Scale bar=200mm. Data is related to Figure 6.


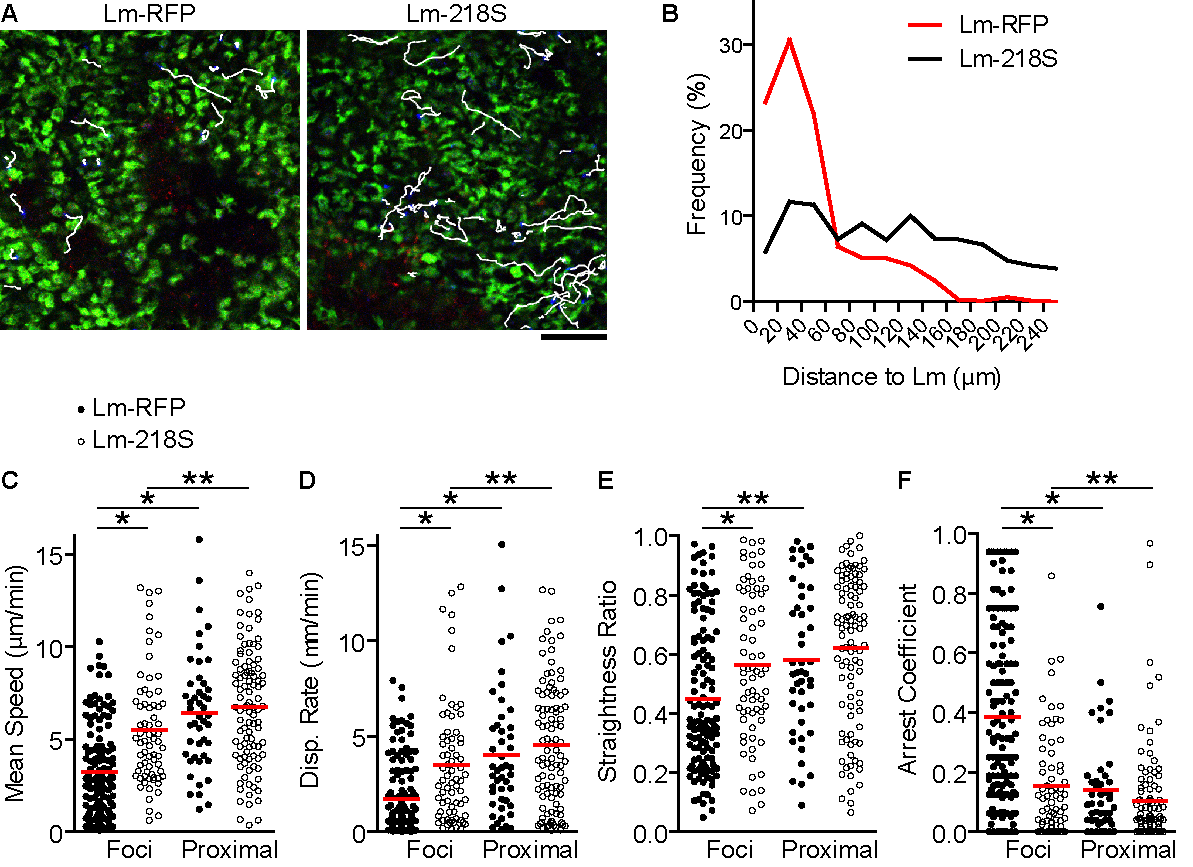


**Figure S10. CD8+ T cell motility inside *Lm* foci is controlled by antigen dependent and independent mechanisms.** L9.6-EGFP cells were activated and rested in vitro, labeled with Bodipy-630 and transferred to CB6/F1 CD11c-EYFP mice at 48 hours p.i. with 2.5 x 104 *Lm-RFP* or *Lm-218S*. A. Intravital images in the spleens of infected mice. L9.6-EGFP Tracks (white), L9.6-EGFP cells (blue), DC (green) and *Lm-RFP* (red) or PI staining of *Lm-218S* foci (red) are shown. Scale bar = 90 m. B. Frequency (%) of L9.6-EGFP cells at the indicated distance from the nearest *Lm* (determined by PI staining in both *Lm-RFP* and *Lm-218S* foci). C-F. L9.6-EGFP motility parameters from mice infected with *Lm-RFP* (filled circles) or *Lm-218S* (open circles). Foci are defined as regions were *Lm-RFP* or PI staining (*Lm-218S*) is detected. L9.6-EGFP cells are characterized as being inside (Foci) or outside the foci but within the viewing field (Proximal). Each circle represents a cell from at least 3 mice per group. C. Mean Speed (m/min). p<0.0001, *; p=0.0057, **. D. Displacement Rate (m/min). p<0.0001, *; p=0.0327, **. E. Straightness Ratio (maximum displacement/track length). p=0.0010, *; 0.0024**. F. Arrest Coefficient (fraction of time a cell crawls < 2 m/min), p<0.0001,*; p=0.0253, **. Data is from 3 mice per group. Data is related to Figure 8.
